# Supplementary material for: Gd3+-Functionalized gold nanoclusters for fluorescence–magnetic resonance bimodal imaging
Source: Royal Society of Chemistry journal article supplement (doi:10.1039/c7bm00608j), 2017-01-01
Supplement: c7bm00608j1.pdf [file c7bm00608j1.pdf]

## Supporting Information

# Gd<sup>3+</sup>-functionalized gold nanoclusters for fluorescence-magnetic resonance bimodal imaging

Guohai Liang,<sup>1</sup> and Lifu Xiao<sup>2\*</sup>

<sup>1</sup>*MOE Key Laboratory of Laser Life Science & Institute of Laser Life Science, College of Biophotonics, South China Normal University, Guangzhou 510631, China. E-mail: liangguoh@scnu.edu.cn,*

<sup>2</sup>*Department of Chemistry & Biochemistry, University of Notre Dame, Notre Dame, Indiana, 46556, U.S.A. Email: Lxiao3@nd.edu*

\*Corresponding author.

### Table of contents:

1. Fig. S1 XPS spectra for (A) BAG and (B) LAG.
2. Fig. S2 Determination of the quantum yields (QY) of the four dual function probes by using Rhodamine 6G as a reference.
3. Table S1  $T_1$ s of samples in Fig.3A (3 T, 25°C)

**A**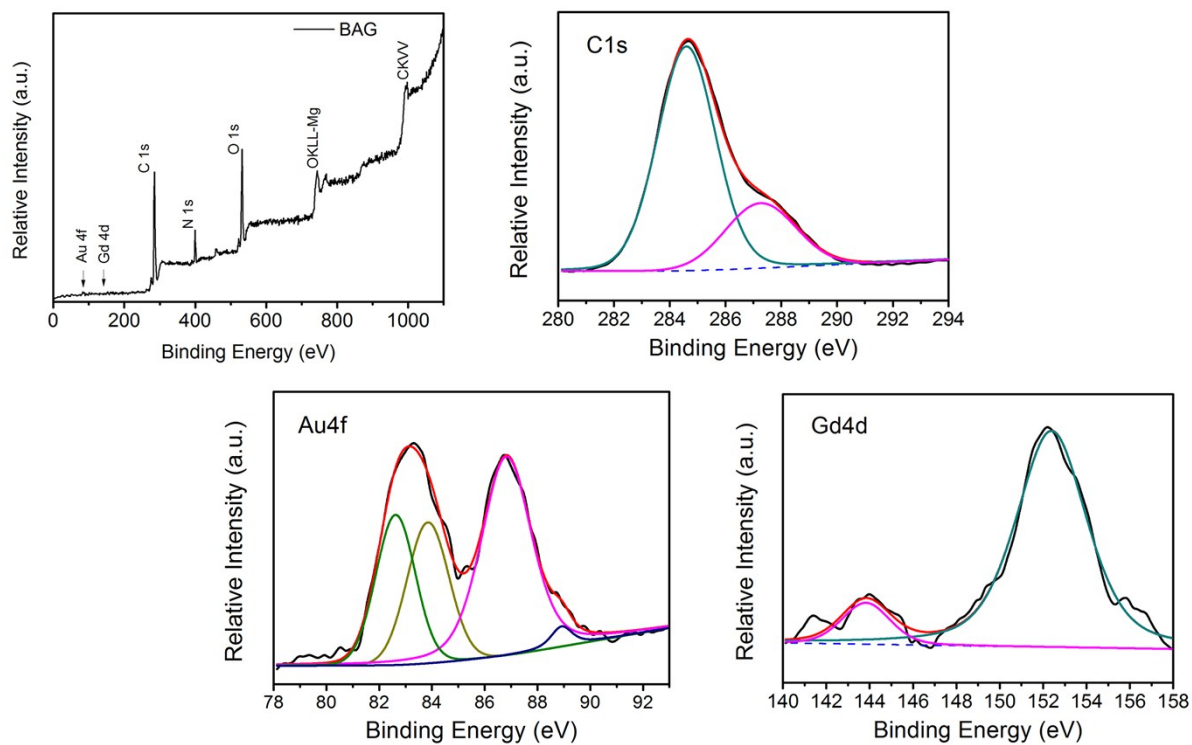**B**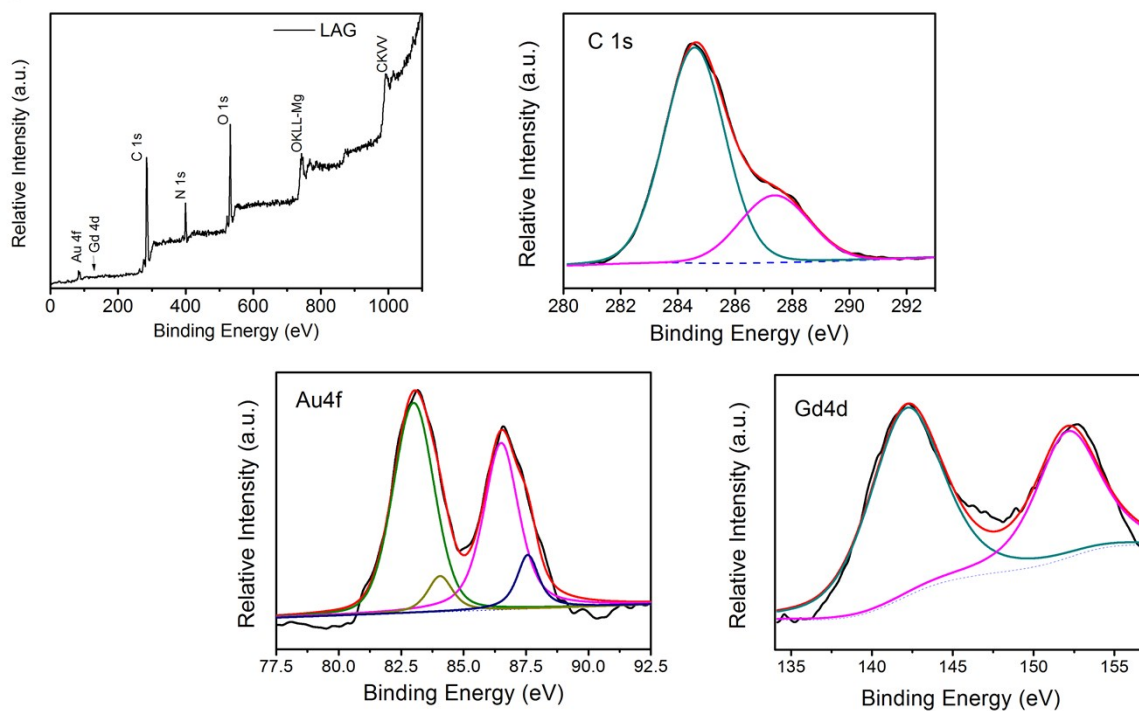

Fig. S1 XPS spectra for (A) BAG and (B) LAG.

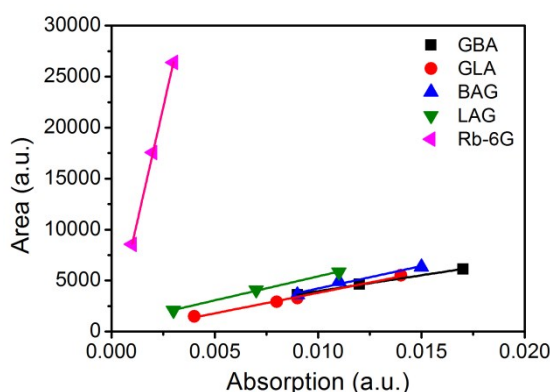

Fig. S2 Determination of the quantum yields (QY) of the four dual function probes by using Rhodamine 6G as a reference. QY of the dual function probes were determined based on the emission peak area and absorbance of the probes and Rhodamin 6G according to the following equation<sup>1</sup>:

$$\varphi_{sample} = \varphi_{ref} \times \frac{F_{sample}}{F_{ref}} \times \frac{A_{ref}}{A_{sample}}$$

Where  $\varphi_{ref}$  is the known QY of reference compound,  $F_{sample}$  and  $F_{ref}$  are the integrated areas of fluorescence of the samples and reference at 550-850 nm following excitation at 510 nm, respectively.  $A_{ref}$  and  $A_{sample}$  are the absorbance of the reference and samples at excitation wavelength (510 nm). The data points were plotted to obtain the QYs of the probes.

Table S1  $T_1$ s of samples in Fig.3A (3 T, 25°C)

| [Gd] (mM) | 0.5   | 0.4   | 0.3   | 0.2   | 0.1     |
|-----------|-------|-------|-------|-------|---------|
| BAG       | 188.0 | 228.2 | 303.4 | 429.8 | 720.3   |
| GBA       | 198.2 | 240.9 | 322.6 | 425.9 | 722.0   |
| LAG       | 209.1 | 253.5 | 327.5 | 459.5 | 758.4   |
| GLA       | 309.5 | 380.5 | 463.6 | 637.0 | 979.6   |
| Gd-DTPA   | 416.1 | 487.9 | 610.0 | 745.0 | 1233.5A |
